# Supplementary material
Source: PubMed Central journal article supplement (PMC3945908)

# Supplementary Figure 1.

A.

| Gene          | Described Function                               | Protein Family                |
|---------------|--------------------------------------------------|-------------------------------|
| <i>Dpf3</i>   | Chromatin remodeling                             | PHD motif                     |
| <i>Fbxl20</i> | Regulator of synaptic activity                   | F-box                         |
| <i>Cul5</i>   | Inhibitor of cell proliferation                  | Cullin                        |
| <i>Kcns3</i>  | Voltage gated potassium channel                  | BTB/POZ motif                 |
| <i>Wdr31</i>  | Function unknown                                 | WD40 motif                    |
| <i>Stam2</i>  | Lysosomal targeting of receptor tyrosine kinases | Ubiquitin Interacting motif   |
| <i>Sumo2</i>  | Gata-2 regulation, chromatin biology             | Small ubiquitin like modifier |
| <i>Fbxl16</i> | E2F1 target                                      | F-box                         |
| <i>Amfr</i>   | Tumor cell motility                              | RING E3 ligase                |
| <i>Rcbtb2</i> | Guanine nucleotide exchange factor               | BTB/POZ motif                 |

B.

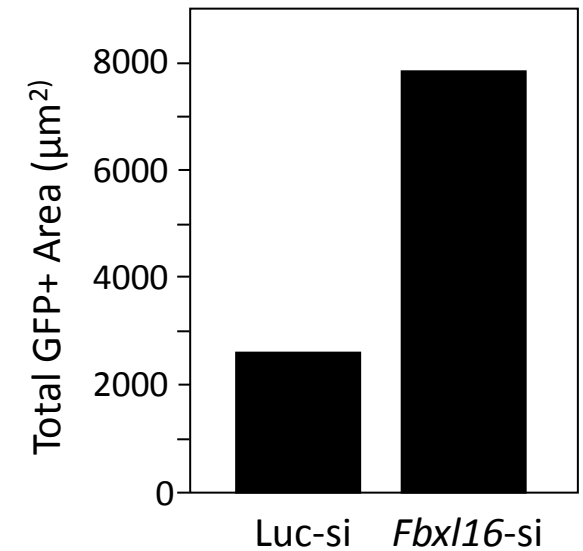

Supplement: supp_M113.031765_mcp.M113.031765-2.pdf [file supp_M113.031765_mcp.M113.031765-2.pdf]
