# Supplementary material
Source: PubMed Central journal article supplement (PMC3945908)

# Supplementary Figure 3.

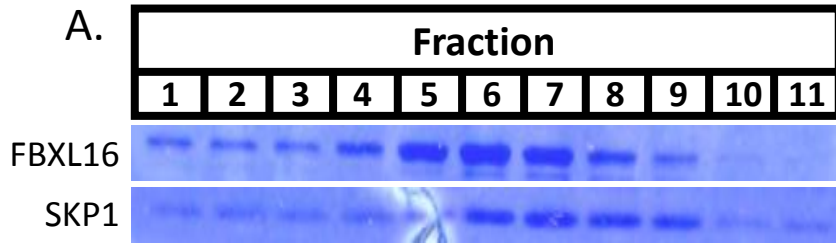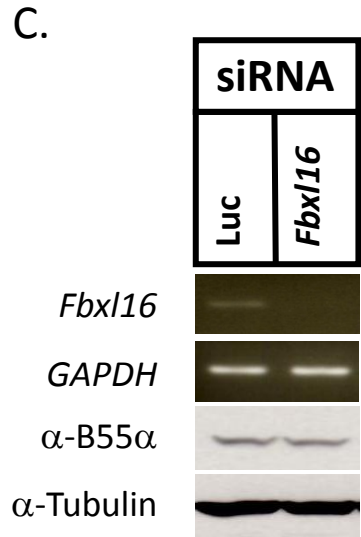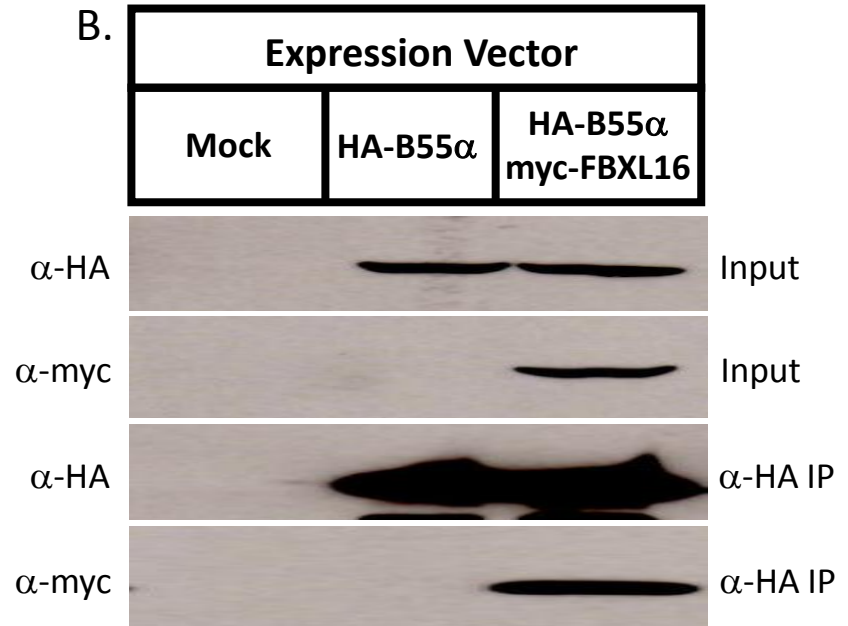

Supplement: supp_M113.031765_mcp.M113.031765-4.pdf [file supp_M113.031765_mcp.M113.031765-4.pdf]
